# Supplementary material
Source: PubMed Central journal article supplement (PMC2566939)
Supplement: NIHMS62321-supplement-File0011.pdf [file NIHMS62321-supplement-File0011.pdf]

## Supporting Information

### Histidine-282 in 5-Aminolevulinatase Affects Substrate Binding and Catalysis

*Tracy D. Turbeville, Junshun Zhang, Gregory A. Hunter and Gloria C. Ferreira*

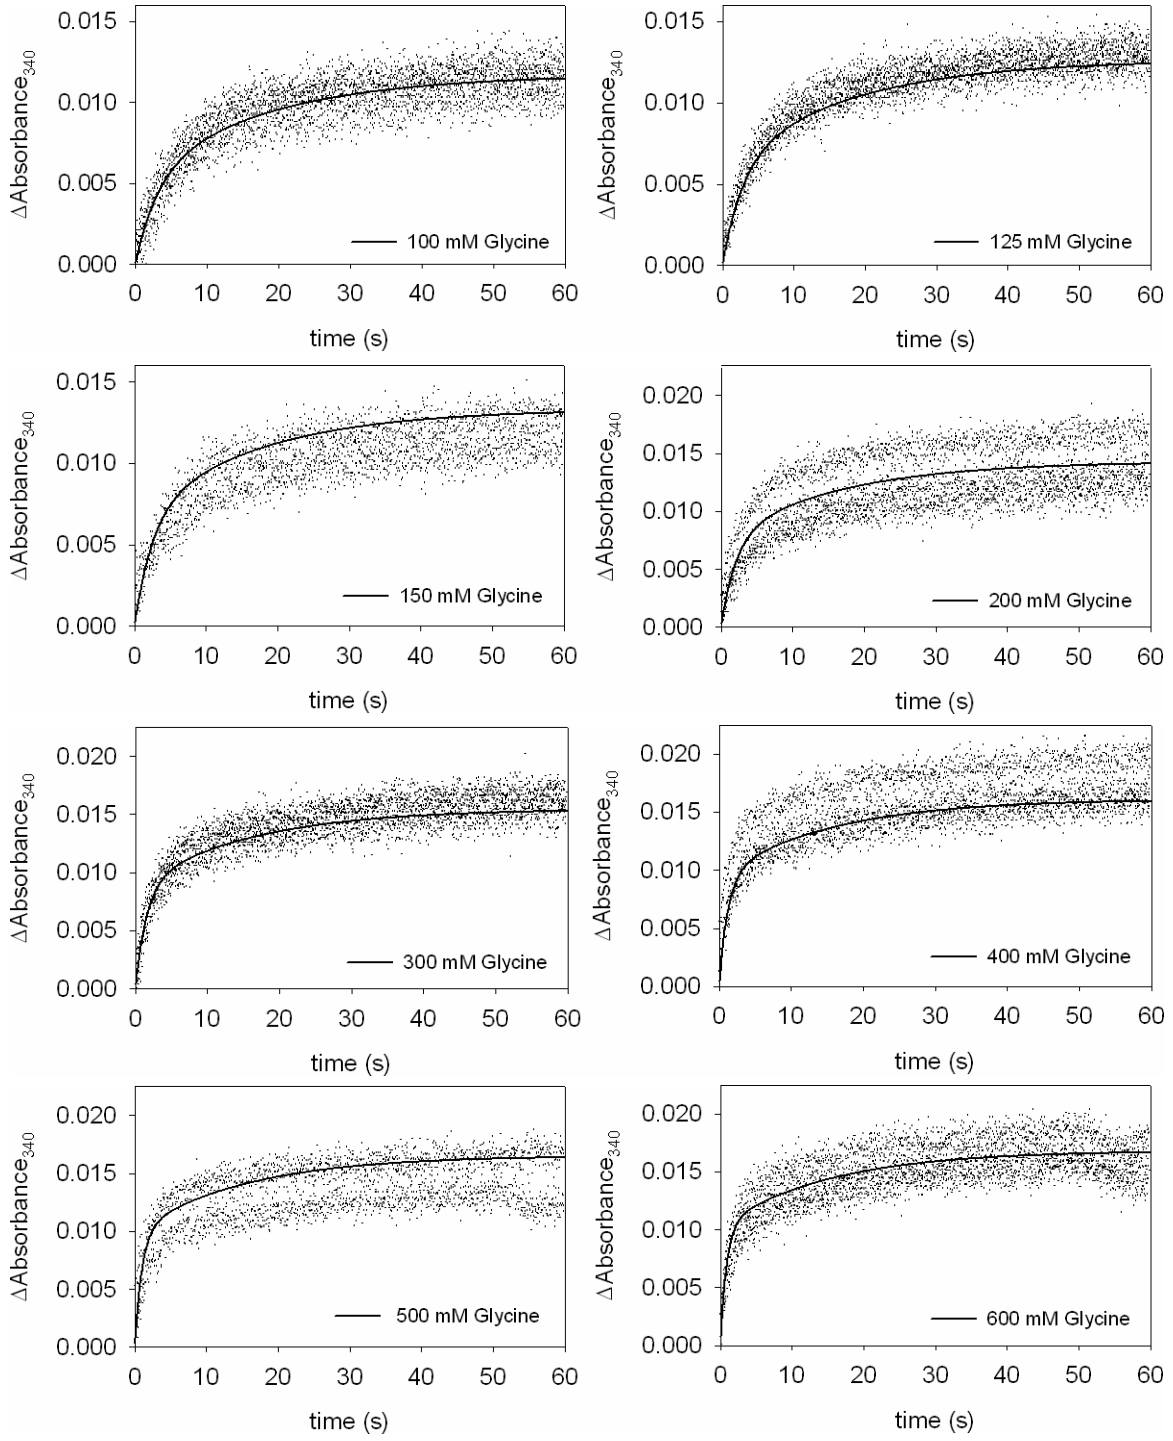

**Figure S1**

Reaction of H282A variant with glycine. The time courses for the reaction of H282A with varying glycine concentrations as monitored by absorbance changes at 420 nm ( $\Delta\text{Absorbance}_{420}$ ) are represented with circles and overlaid with the lines representing the fitted data. The absorbance changes at 420 nm ( $\Delta\text{Absorbance}_{420}$ ) were globally fit to a two-step mechanism using the simulation program DynaFit.
